# Supplementary material for: The Yin and Yang of Yeast Transcription: Elements of a Global Feedback System between Metabolism and Chromatin
Source: PubMed Central journal article supplement (PMC3369881; doi:10.1371/journal.pone.0037906), 2012-06-07
Supplement: pone.0037906.s022.pdf [file pone.0037906.s022.pdf]

**Supporting Table S2. Cluster size, TSS fraction and phase angle density peaks.**

|                           | <b>A</b> | <b>AB</b> | <b>B</b> | <b>B.C</b> | <b>C</b> | <b>B.D</b> | <b>D</b> | <b>l.b</b> | <b>cd.ab</b> | <b>ab.n</b> | <b>l</b> | <b>cd.n</b> | <b>n</b> | <b>r</b> |  |
|---------------------------|----------|-----------|----------|------------|----------|------------|----------|------------|--------------|-------------|----------|-------------|----------|----------|--|
| # of genes                | 414      | 160       | 135      | 144        | 388      | 118        | 640      | 815        | 132          | 295         | 475      | 1502        | 353      | 224      |  |
| % with TSS                | 97.8     | 96.9      | 91.9     | 95.8       | 94.1     | 95.8       | 93.1     | 95.1       | 93.9         | 93.6        | 92       | 93          | 51.8     | 39.3     |  |
| # with TSS                | 405      | 155       | 124      | 138        | 365      | 113        | 596      | 775        | 124          | 276         | 437      | 1397        | 183      | 88       |  |
| phase angles, °           |          |           |          |            |          |            |          |            |              |             |          |             |          |          |  |
| 0.7 h                     | 28       | 58        | 89       | 106        | 211      | 118        | 213      | 90         | 189          | 99          | 134      | 204         | 105      | NA       |  |
| 5 h                       | 20       | 43        | 40       | 83         | 92       | 294        | 265      | 39         | 27           | 39          | 61       | 42          | 1        | 3        |  |
| combined                  | 26       | 54        | 71       | 96         | 128      | 132        | 234      | 52         | 57           | 70          | 89       | 221         | 41       | NA       |  |
| 1 <sup>st</sup> peak, min |          |           |          |            |          |            |          |            |              |             |          |             |          |          |  |
| 0.7 h                     | 24       | 27        | 31       | 33         | 45       | 34         | 45       | 31         | 42           | 32          | 36       | 44          | 33       | NA       |  |
| 5 h                       | 192      | 211       | 208      | 244        | 252      | 420        | 396      | 208        | 197          | 207         | 226      | 210         | 176      | 177      |  |

Cluster size, TSS fraction and phase angle density peaks. Number of genes in each cluster, fraction of cluster genes for which TSS could be found (see Methods section “Transcription Start Sites”), circular density peaks of cluster gene phase angles, and peak time (time of experiment, with the first sample as origin time 0) in the first cycle, estimated from phase angle density peaks and the cycle periods (42 min and 300 min, respectively).
